# Supplementary material
Source: Springer Nature journal article supplement (https://www.springermedizin.de/resource/supplementary/12958_2012_997_MOESM3_ESM.pdf/9566582)

# Ovarian stages of chub mackerel analyzed in the study period

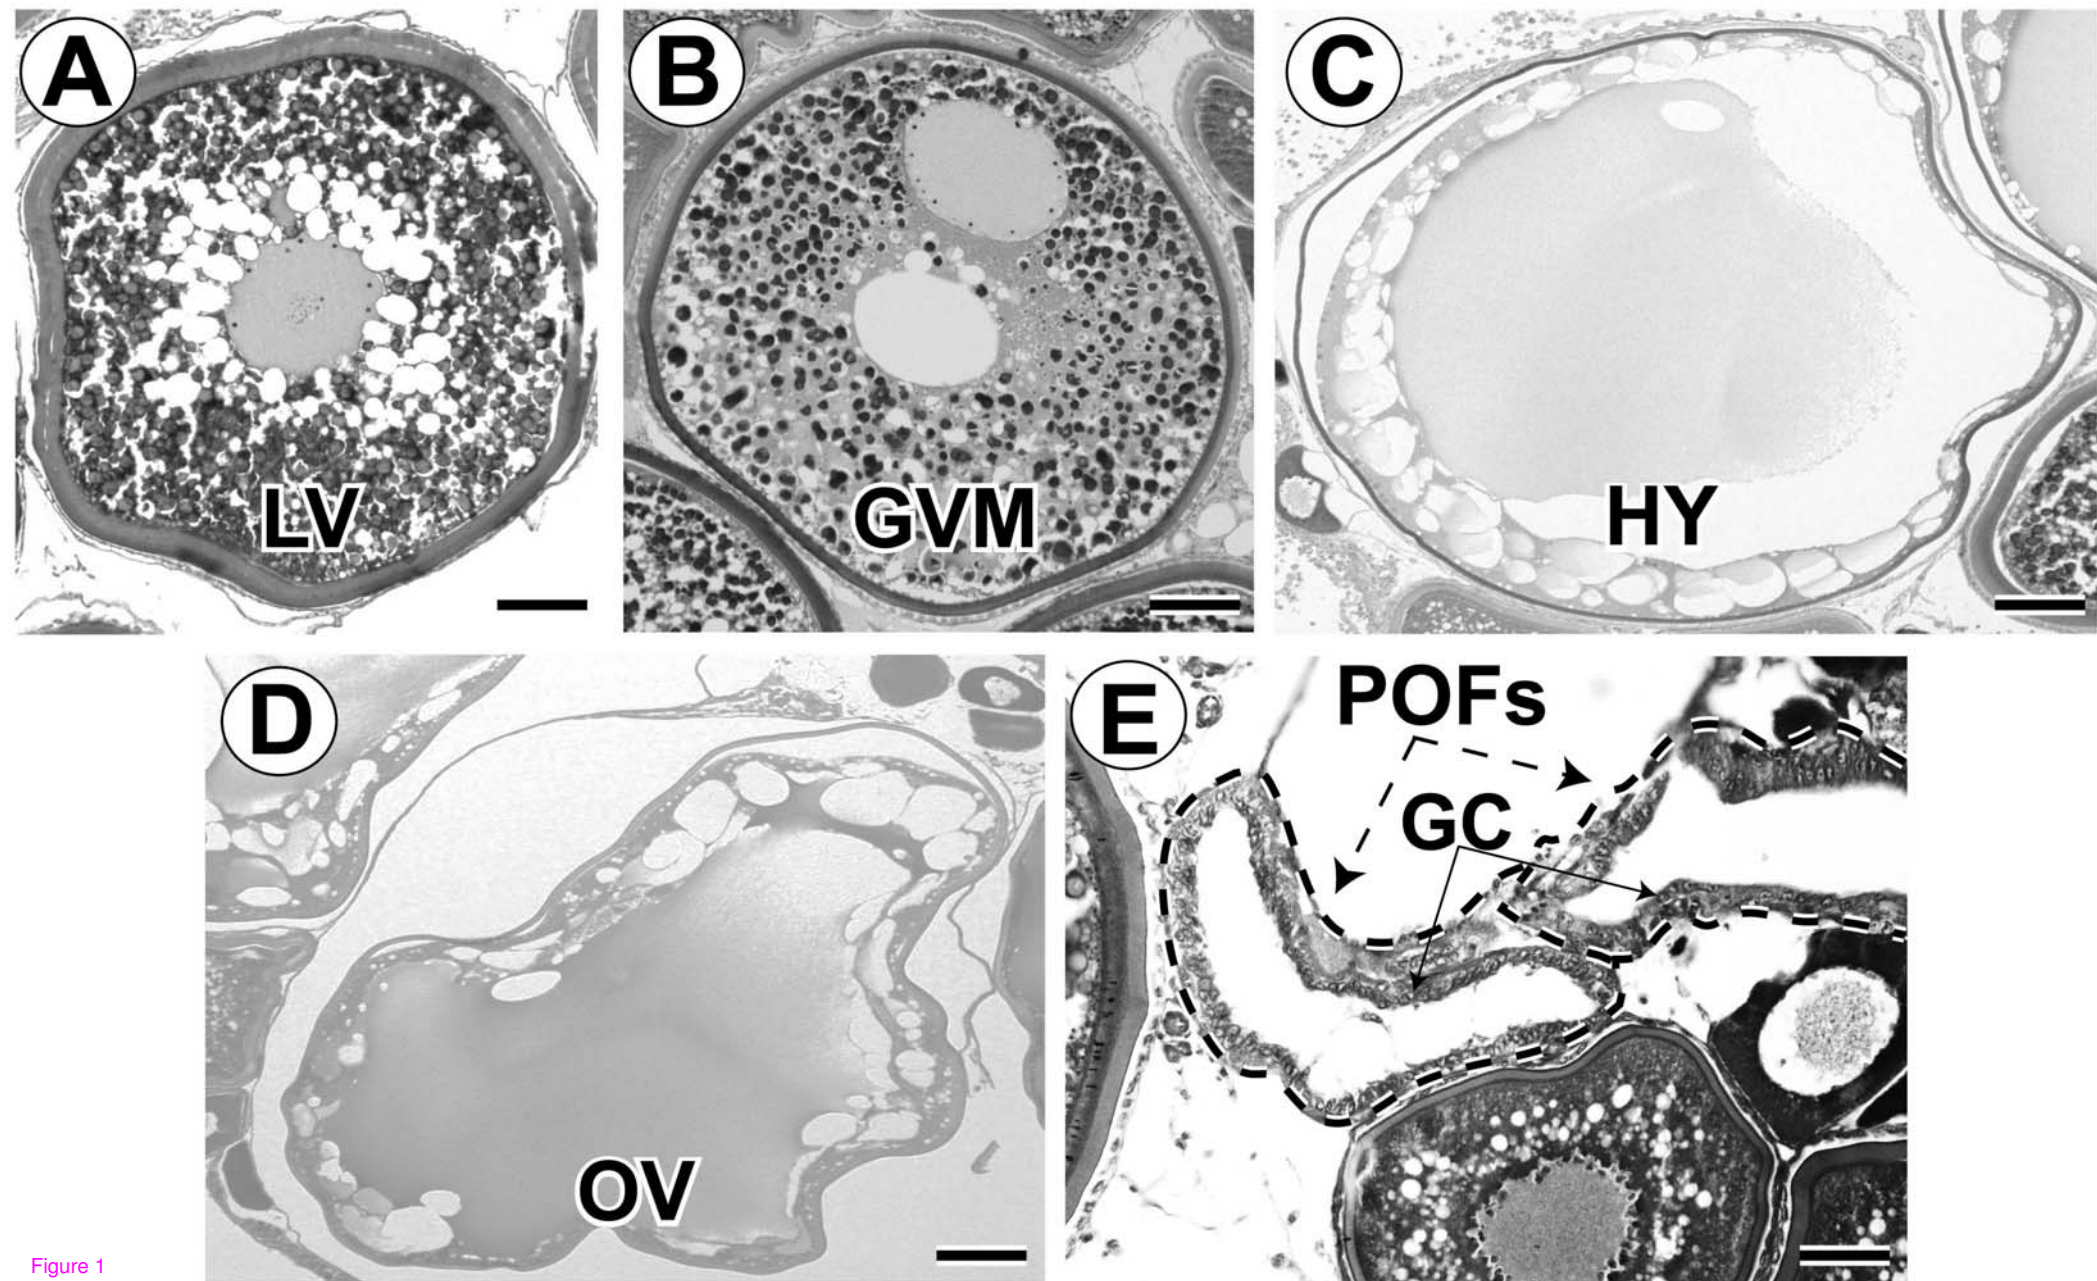

Figure 1

Supplement: MOESM3 [file 9566582]
